# Supplementary material for: Elucidating sensing mechanisms of a pyrene excimer-based calix[4]arene for ratiometric detection of Hg(ii) and Ag(i) and chemosensor behaviour as INHIBITION or IMPLICATION logic gates
Source: Royal Society of Chemistry journal article supplement (doi:10.1039/d0ra04092d), 2020-01-01
Supplement: d0ra04092d1.pdf [file d0ra04092d1.pdf]

# Supporting Information

Elucidating sensing mechanisms of a pyrene-excimer based calix[4]arene for ratiometric detection of Hg(II) and Ag (I) and chemosensor behaviour as INHIBITION or IMPLICATION logic gates

Julio Rodríguez-Lavado\*<sup>a</sup>, Alejandro Lorente<sup>a</sup>, Erick Flores<sup>b</sup>, Andrés Ochoa<sup>a</sup>, Fernando Godoy<sup>b</sup>, Pablo Jaque<sup>a</sup>, Claudio Saitz\*<sup>a</sup>

<sup>a</sup> Departamento de Química Orgánica y Físicoquímica, Facultad de Ciencias Químicas y Farmacéuticas, Universidad de Chile, Olivos 1007, Santiago, Chile

<sup>b</sup> Departamento de Química de los Materiales, Universidad de Santiago de Chile, Libertador Bernardo O'Higgins 3363, Santiago, RM

email of the corresponding authors: [julio.rodriguez@ciq.uchile.cl](mailto:julio.rodriguez@ciq.uchile.cl), [clsaitz@ciq.uchile.cl](mailto:clsaitz@ciq.uchile.cl)

|             |                                                                                |           |
|-------------|--------------------------------------------------------------------------------|-----------|
| <b>I.</b>   | <b>Experimental Information</b>                                                |           |
| a)          | Figures S1 to S7 and Table S1.....                                             | 2-5       |
| b)          | NMR Spectra.....                                                               | 6-9       |
| c)          | Mass Spectra.....                                                              | 0         |
| <b>II.</b>  | <b>Conformational Analysis of derivative 1 and Frontier Molecular Orbitals</b> |           |
|             | Conformers derivative 1, Figure S13.....                                       | 10        |
|             | Frontier Molecular Orbitals of 2a, Figure S14 .....                            | 11        |
| <b>III.</b> | <b>Boolean Operations for two inputs.....</b>                                  | <b>12</b> |

## I. EXPERIMENTAL INFORMATION

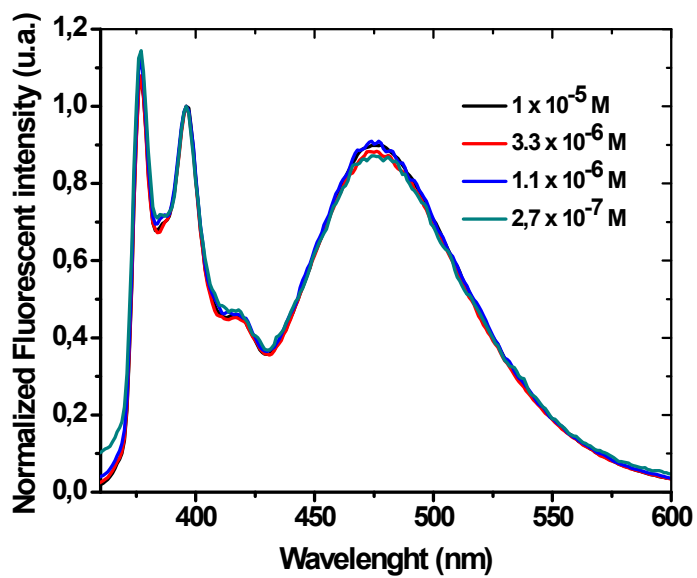

**Figure S1.** Normalized fluorescence intensities of **2** at different dilutions ( $\text{CH}_3\text{CN}/\text{DMSO}$  99:1).

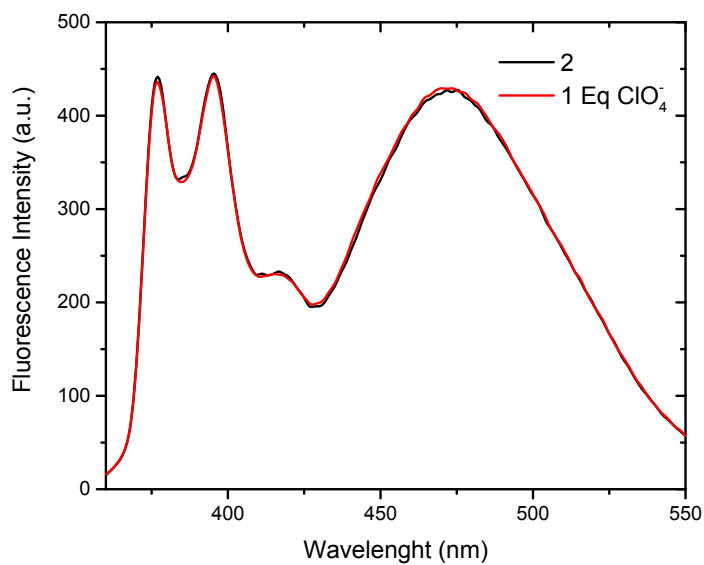

**Figure S2.** Fluorescence spectra of **2** (1.15  $\mu\text{M}$  in  $\text{CH}_3\text{C}/\text{DMSO}$  99:1) in presence of 2 equivalents of  $\text{NBu}_4\text{ClO}_4$ .

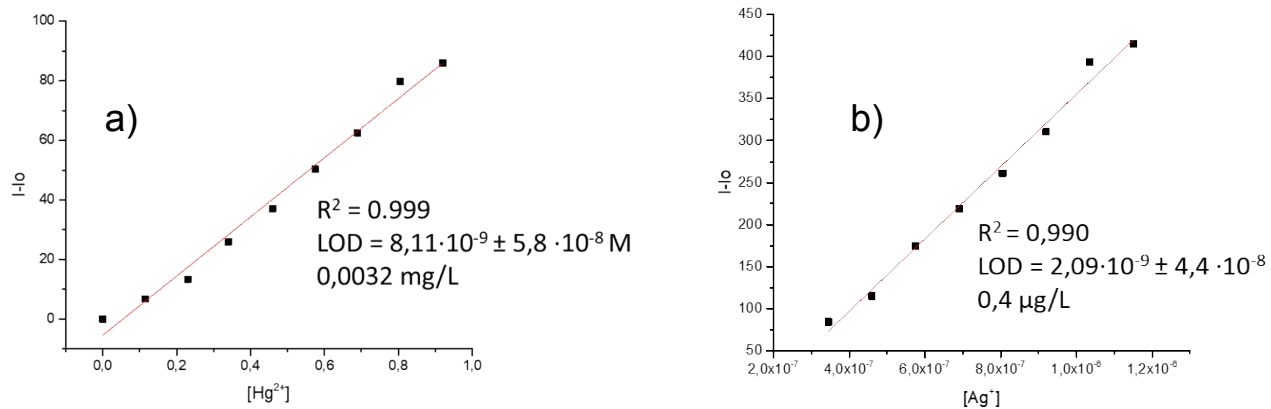

**Figure S3.** Calibration curve of **2** with  $\text{Hg}^{2+}$  (a) and  $\text{Ag}^+$  (b) in ( $\text{CH}_3\text{CN}/\text{DMSO}$  99:1) for LOD determination.

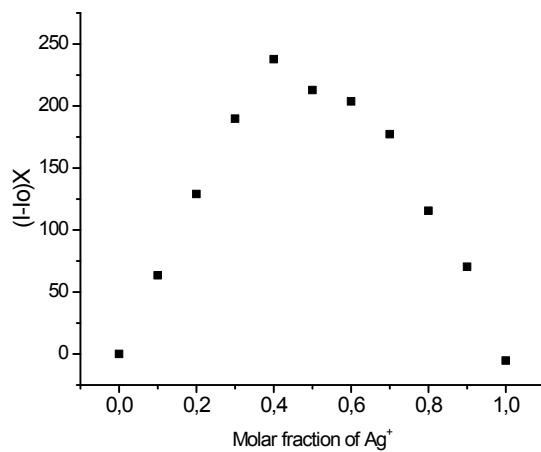

**Figure S4.** Job Plot for a complex of compound **2** and  $\text{Ag}^+$  ion ( $\lambda=372 \text{ nm}$ ,  $\text{CH}_3\text{CN}/\text{DMSO}$  99:1)

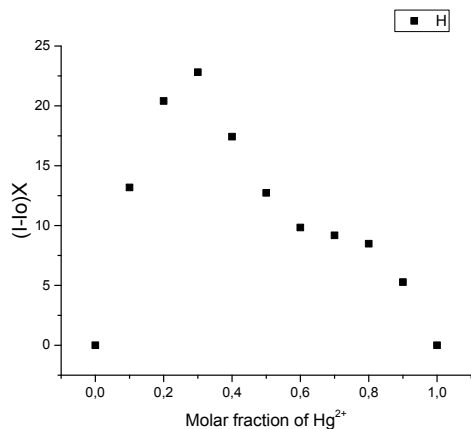

**Figure S5.** Job Plot for a complex of compound **2** and  $\text{Hg}^{2+}$  ion ( $\lambda=372$  nm,  $\text{CH}_3\text{CN}/\text{DMSO}$  99:1)

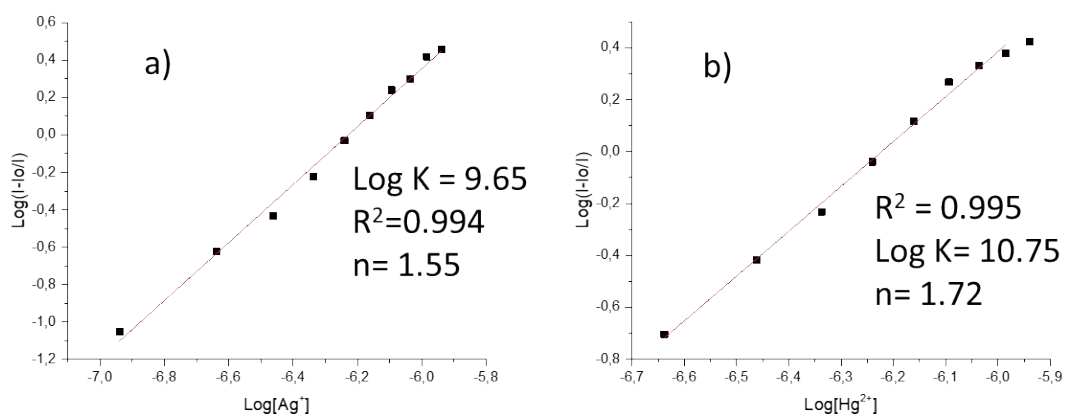

**Figure S6.** Hill Plots for the complexes **2**: $\text{Ag}^+$  (a) and **2**: $\text{Hg}^{2+}$  (b) in  $\text{CH}_3\text{CN}/\text{DMSO}$  (99:1)

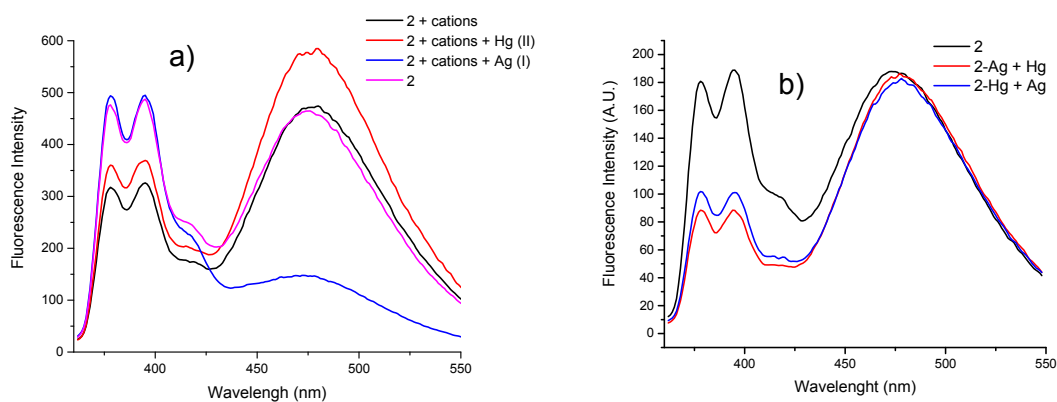

**Figure S7.** a) Interference studies of **2** in presence of  $\text{Ag}^+$ ,  $\text{Hg}^{2+}$ , and cation mixture and (b) competitive interferent study of **2** with  $\text{Ag}^+$  and  $\text{Hg}^{2+}$

| Ref            | LOD Hg <sup>2+</sup> (nM) | LOD Ag <sup>+</sup> (nM) | Solvent                      |
|----------------|---------------------------|--------------------------|------------------------------|
| 65             | 70                        | -                        | THF                          |
| 67             | 100                       | -                        | THF/H <sub>2</sub> O 9:1     |
| 64             | 36                        | -                        | HEPES/CH <sub>3</sub> CN 3:7 |
| 66             | 12500                     | -                        | MeOH                         |
| 69             | -                         | 68                       | Acetic/Acetate Buffer        |
| 68             | -                         | 200                      | DMF                          |
| 2 <sup>a</sup> | 2.09                      | 8.11                     | CH <sub>3</sub> CN           |

**Table S1.** Comparative Results for Hg<sup>2+</sup> and Ag<sup>+</sup> detection probes. <sup>a</sup>Compound **2** studied in the present work

a)  $^1\text{H}$  and  $^{13}\text{C}$  Spectra

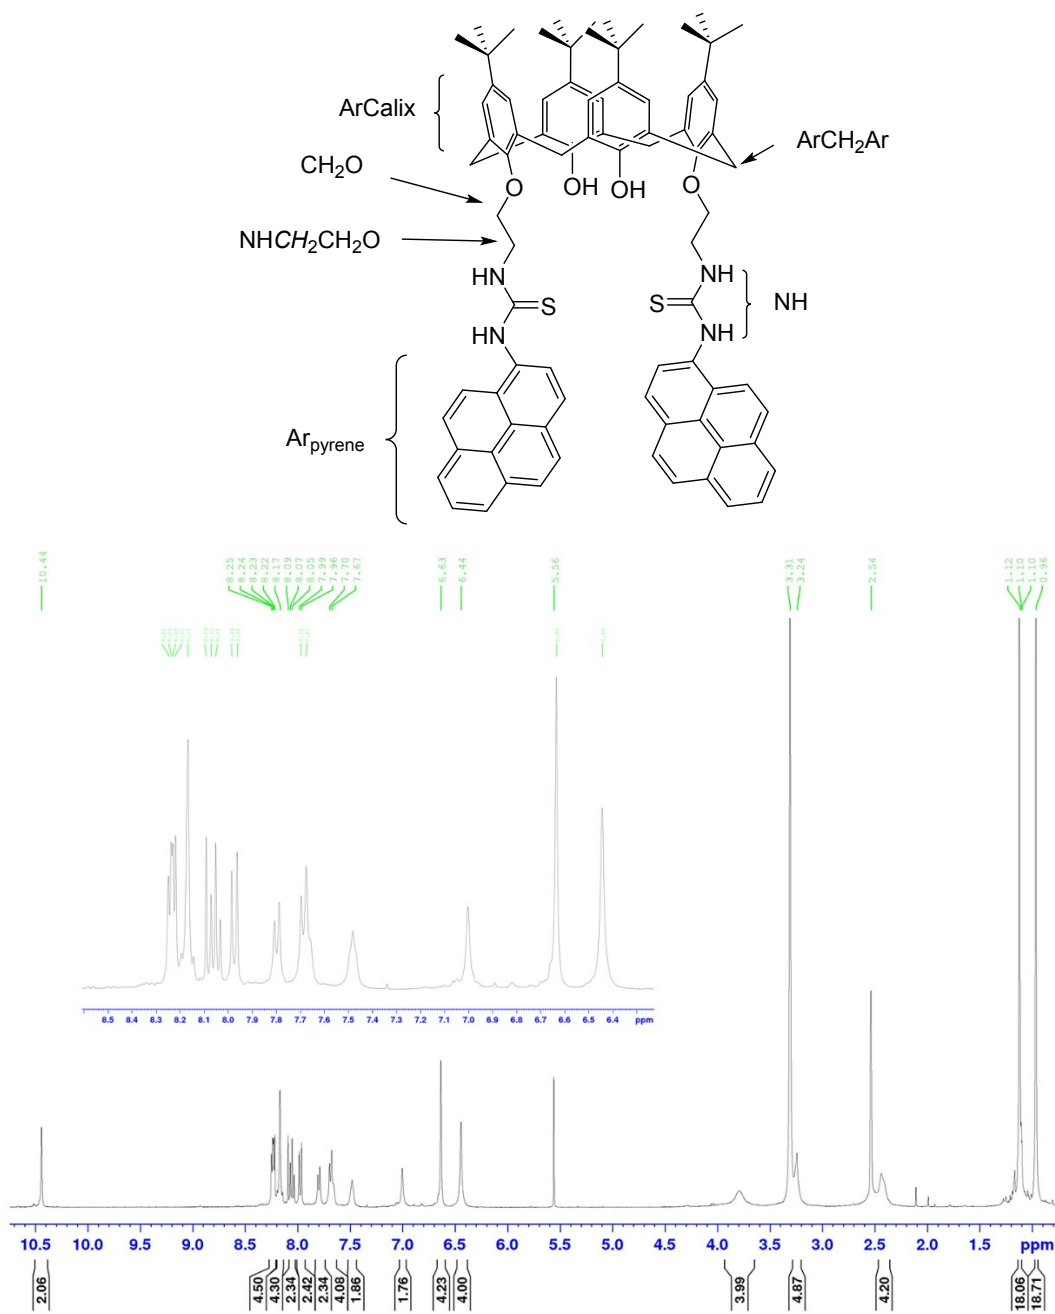

Figure S8.  $^1\text{H}$  NMR Spectrum (300 MHz, 298 K) of compound 1.

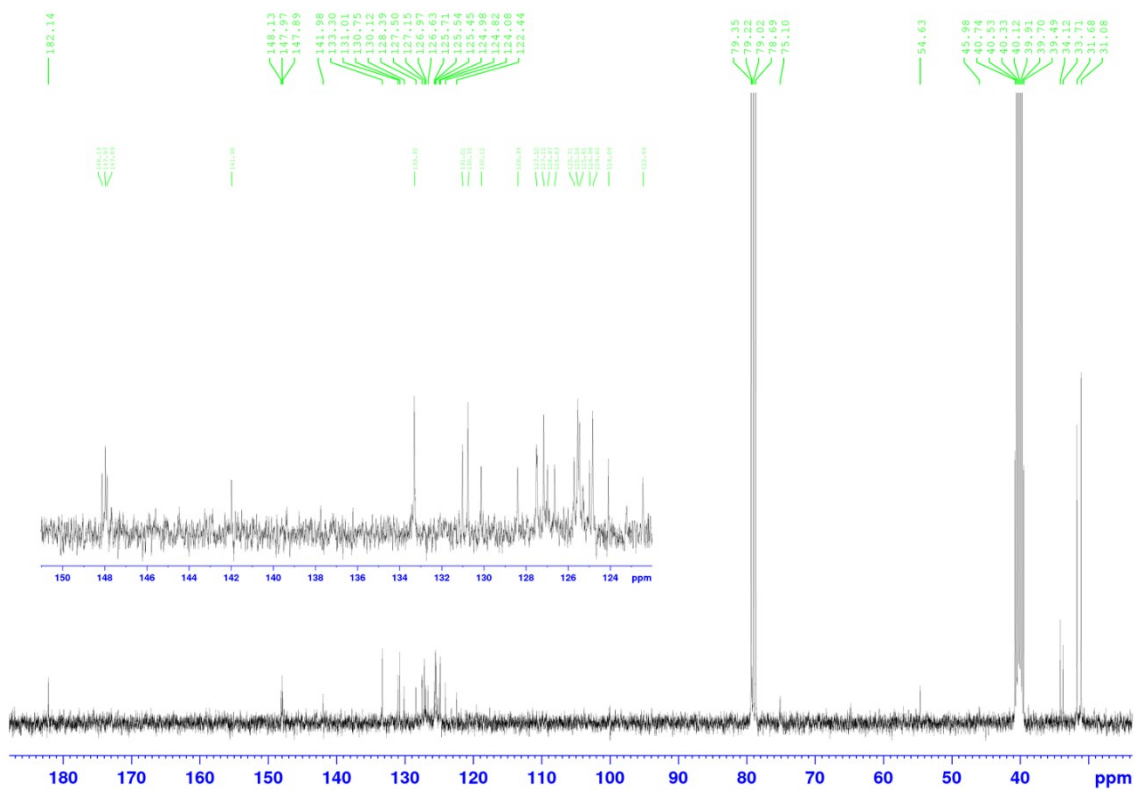

**Figure S9.**  $^{31}\text{P}$  NMR Spectrum (75.5 MHz, 298 K) of compound **1**.

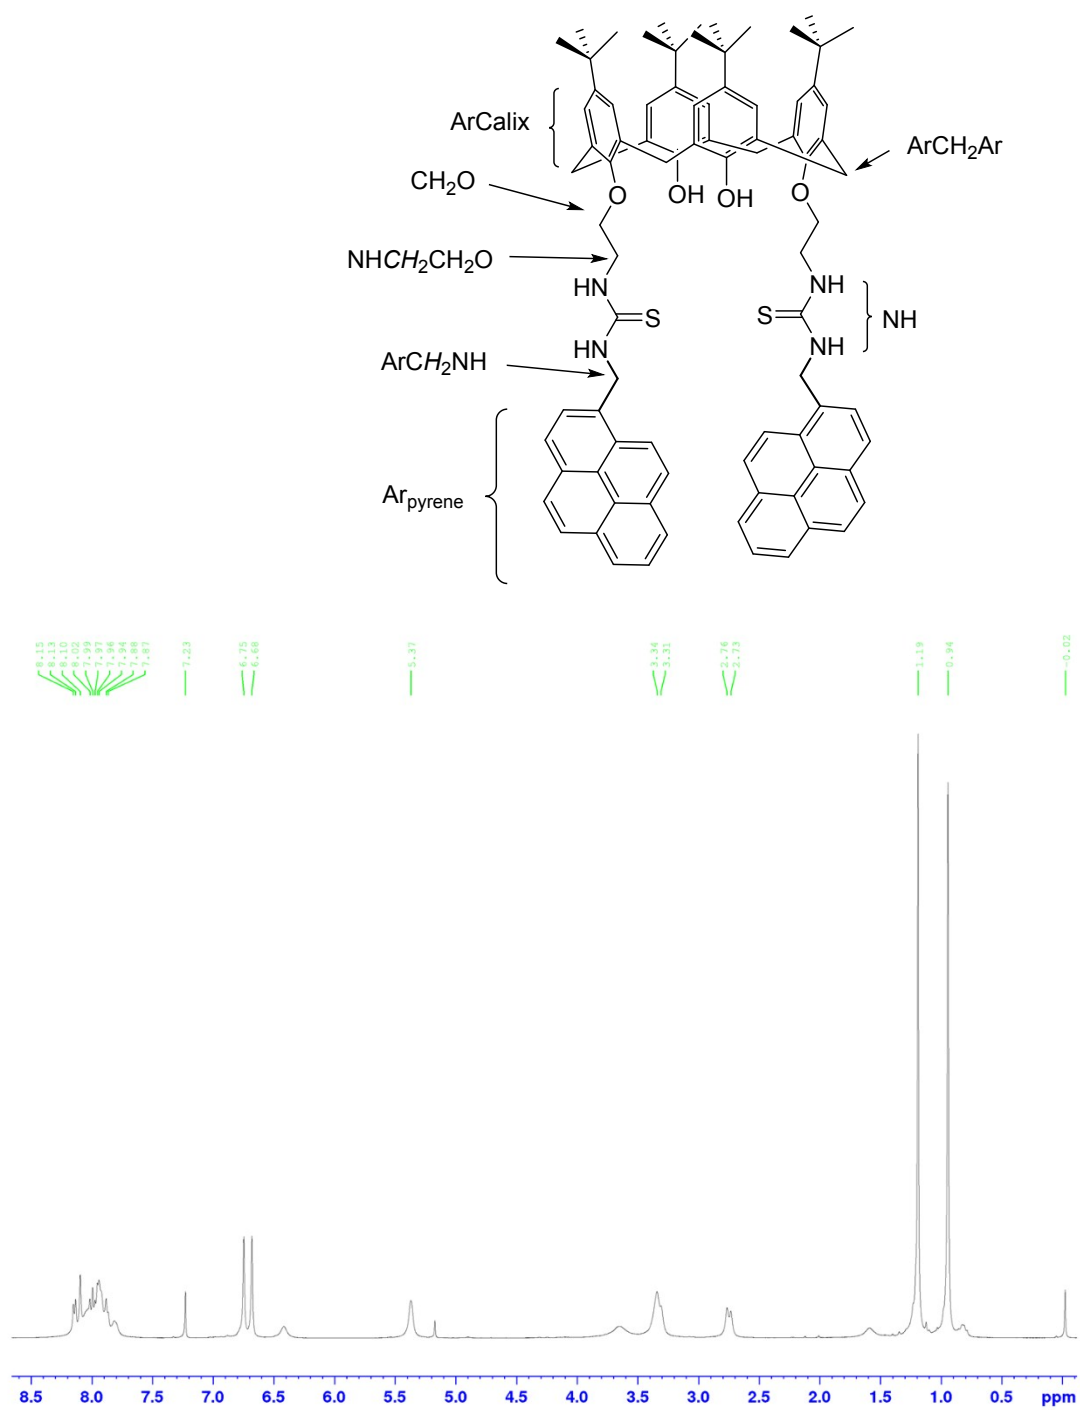

**Figure S10.**  $^1\text{H}$  NMR Spectrum (300 MHz, 298 K) of compound 2.



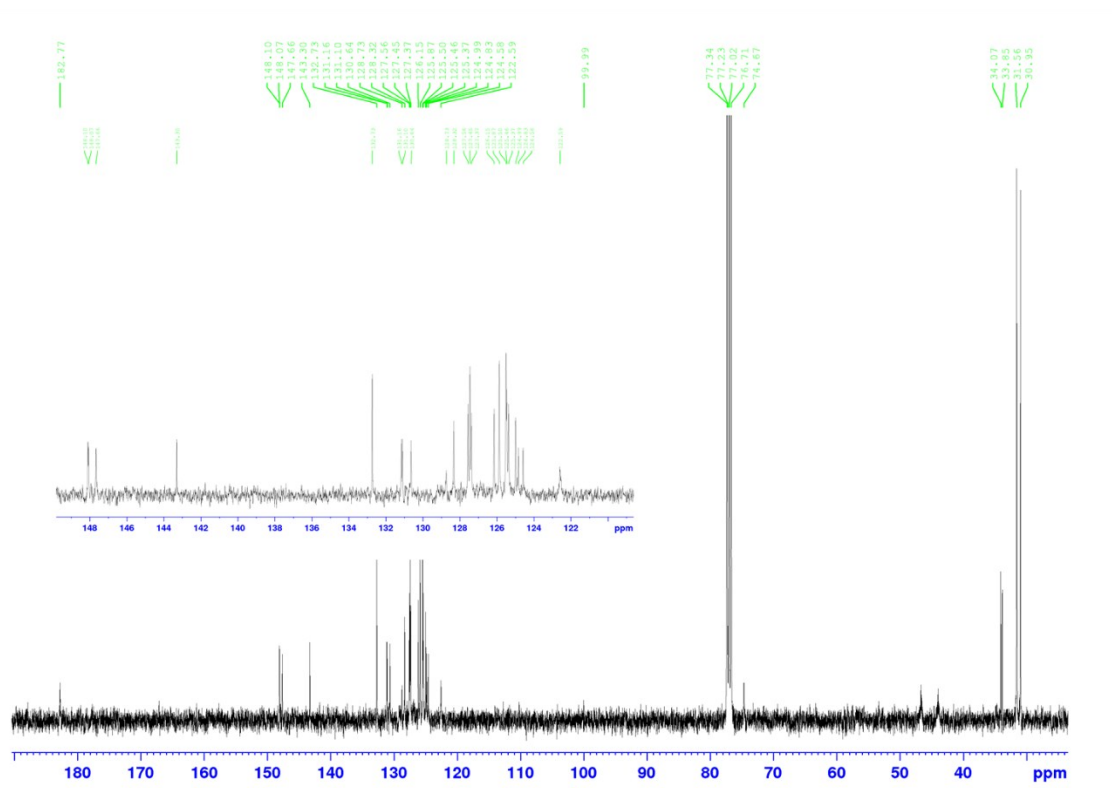

**Figure S11.** <sup>13</sup>C NMR Spectrum (75.5 MHz, 298 K) of compound **2**.

## b) Mass Spectra

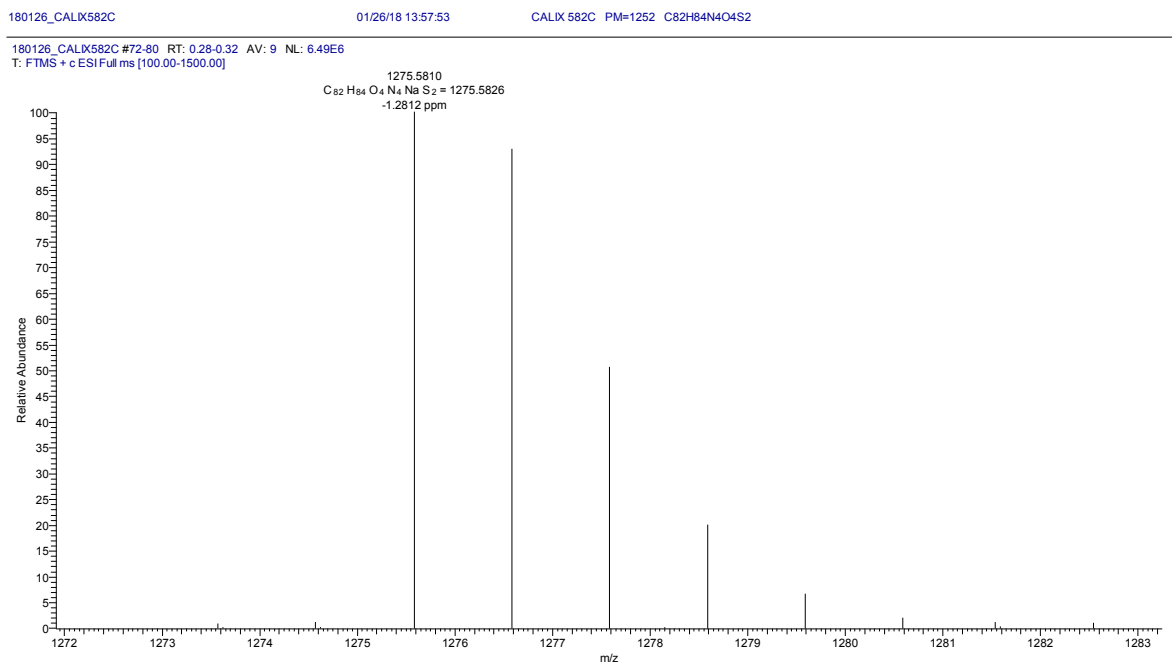

**Figure S12.** HR2MS (ESI) of compound **1**

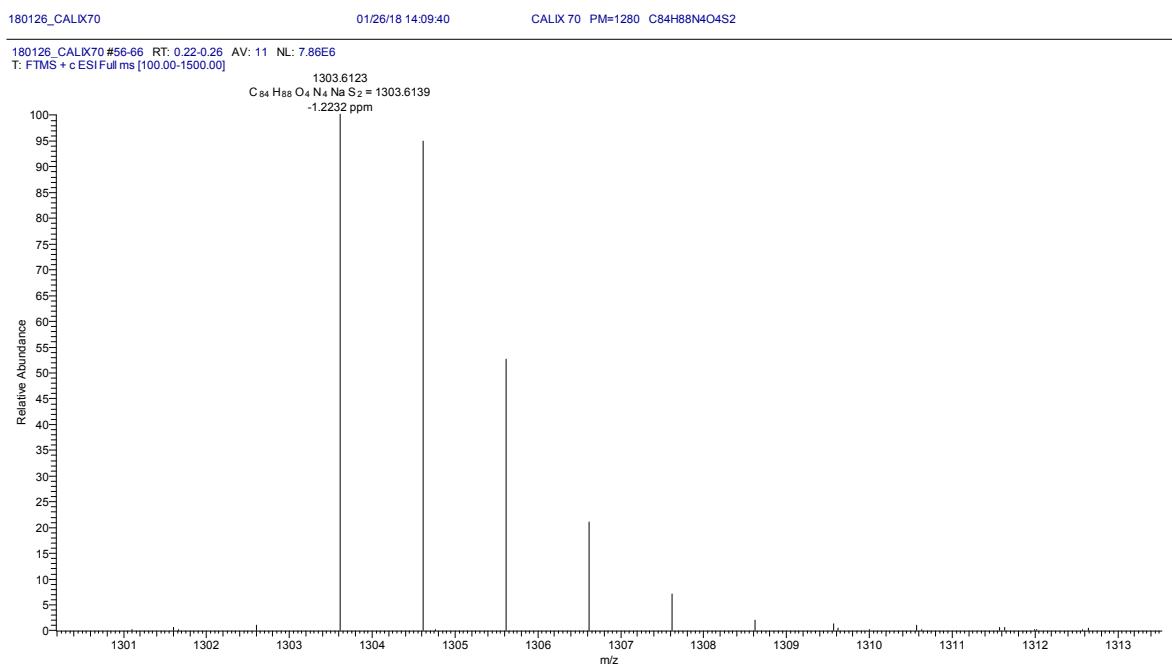

**Figure S13.** HR-MS (ESI) of compound **2**.

## II. Conformational analysis of derivative 1 and Frontier Molecular Orbitals

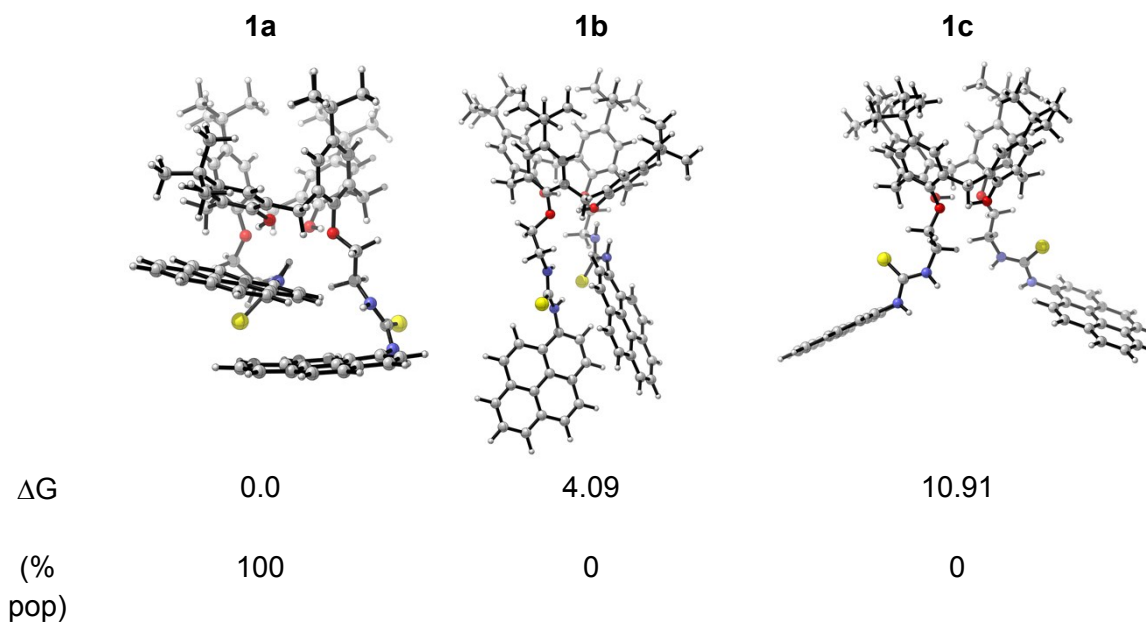

**Figure S14.** Highest (H-1 and H) and lowest (L and L+1) molecular orbitals of **2a**.

### Frontiers Molecular Orbitals of 2a

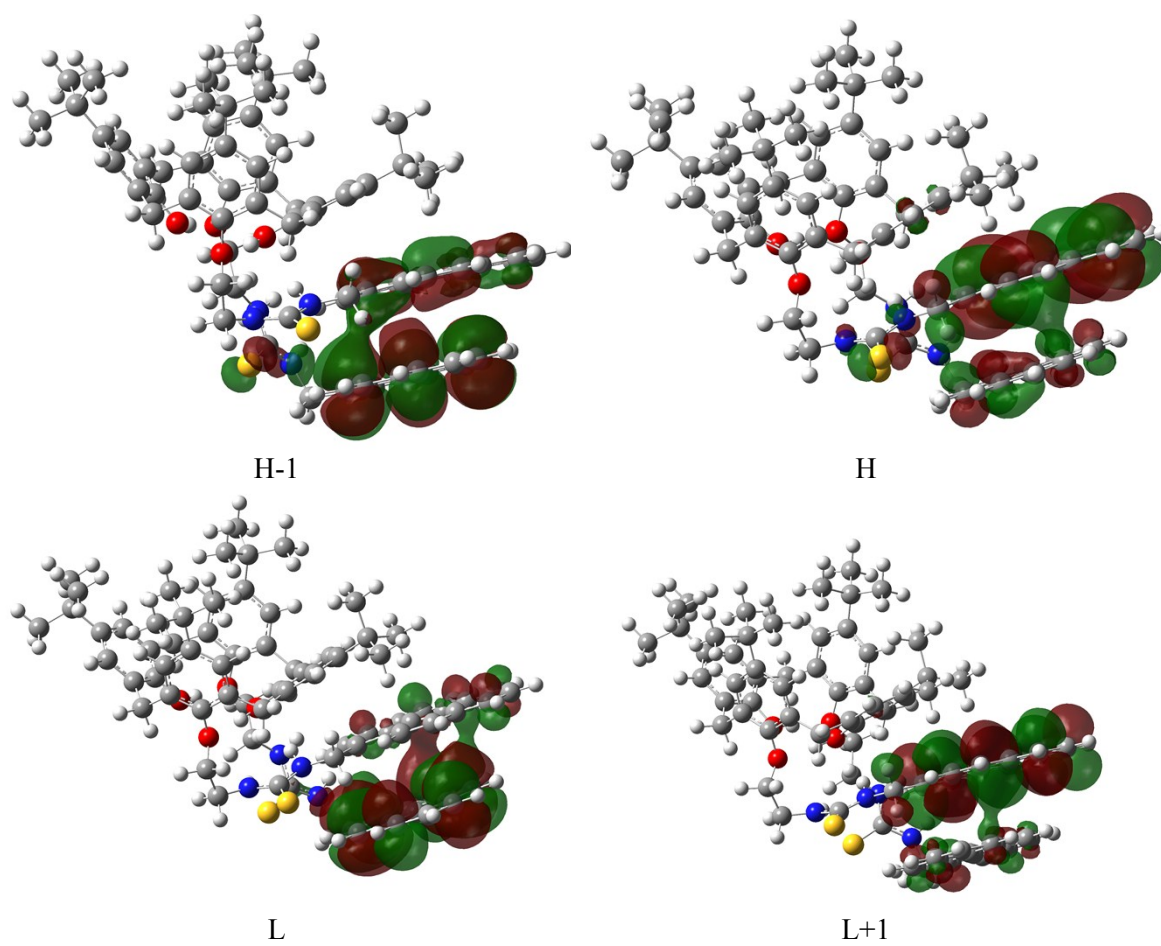

**Figure S15.** Highest (H-1 and H) and lowest (L and L+1) molecular orbitals of 2a.

### III. Boolean operations for two inputs

**Table S2.** Table of Boolean Operations for two inputs [1]

| Operation N° | Commutative to operation N° | Result for |            |            |            | Entry                  | Meaning           | Logic gate  |
|--------------|-----------------------------|------------|------------|------------|------------|------------------------|-------------------|-------------|
|              |                             | A=0<br>B=0 | A=0<br>B=1 | A=1<br>B=0 | A=1<br>B=1 |                        |                   |             |
| 0            | 15                          | 0          | 0          | 0          | 0          | '0' constant           | '0' constant      | ZERO        |
| 1            | 14                          | 0          | 0          | 0          | 1          | Conjunction            | A and B           | AND         |
| 2            | -                           | 0          | 0          | 1          | 0          | Exclusion              | A excludes B      | INHIBIT     |
| 3            | 12                          | 0          | 0          | 1          | 1          | 1st variable           | A                 | ID A        |
| 4            | -                           | 0          | 1          | 0          | 0          | Exclusion              | B excluding A     | INHIBIT     |
| 5            | 10                          | 0          | 1          | 0          | 1          | 2nd variable           | B                 | ID B        |
| 6            | 9                           | 0          | 1          | 1          | 0          | Nonequivalence         | Either A or B     | XOR         |
| 7            | 8                           | 0          | 1          | 1          | 1          | Disjunction            | A or B            | OR          |
| 8            | 7                           | 1          | 0          | 0          | 0          | Nondisjunction         | Neither A or B    | NOR         |
| 9            | 6                           | 1          | 0          | 0          | 1          | Equivalence operation  | A equivalent to B | EQU         |
| 10           | 5                           | 1          | 0          | 1          | 0          | Negation of variable B | Not B             | INV B       |
| 11           | -                           | 1          | 0          | 1          | 1          | Implication            | B implies A       | IMPLICATION |
| 12           | 3                           | 1          | 1          | 0          | 0          | Negation of variable A | Not A             | INV A       |
| 13           | -                           | 1          | 1          | 0          | 1          | Implication            | A implies B       | IMPLICATION |
| 14           | 1                           | 1          | 1          | 1          | 0          | Nonconjunction         | No both A and B   | NAND        |
| 15           | 0                           | 1          | 1          | 1          | 1          | '1' constant           | '1' constant      | ONE         |
